# Supplementary material
Source: Springer Nature journal article supplement (https://www.springermedizin.de/resource/supplementary/13256_2013_2803_MOESM7_ESM.pdf/9650522)
Supplement: MOESM7 [file 9650522]

Table 1

Diagnostic criteria for Hypomelanosis of Ito

| Criterion             | Features:                                                                                                                               |
|-----------------------|-----------------------------------------------------------------------------------------------------------------------------------------|
| 1 (sine qua non)      | Congenital or early acquired nonhereditary cutaneous hypopigmentation in linear streaks or patches involving more than 2 body segments. |
| 2 (major)             | 1 or more nervous system anomalies; 1 or more musculoskeletal anomalies.                                                                |
| 3 (minor)             | 2 or more congenital malformations other than nervous system or musculoskeletal. Chromosomal anomalies.                                 |
| Definitive diagnosis: | Criterion 1 plus 1 or more criterion 2 or 2 or more criterion 3.                                                                        |
| Presumptive diagnosis | Criterion 1 alone or in association with 1 minor criterion.                                                                             |
